# Supplementary material
Source: PubMed Central journal article supplement (PMC3033277)
Supplement: 1012232108_pnas.201012232SI.pdf [file 1012232108_pnas.201012232SI.pdf]

# Supporting Information

Zhang et al. 10.1073/pnas.1012232108

## SI Materials and Methods

**Mutant Characterization.** Germination assays were performed on filter paper as described (1) using 3-mo-old seeds harvested at the same time. Germination was scored by seed coat rupture after 8-d incubation under constant light at 22 °C. For root and hypocotyl elongation assays, seeds were plated on 0.5× MS media and 1% sucrose ± paclobutrazol (PAC) or gibberellins (GA). After 4 d at 4 °C in the dark, the square plates were placed vertically in continuous light at 22 °C. For assays of the etiolated seedlings, the plates (after 24 h in the light) were incubated in the dark at 22 °C until measurement on day 6. Root and hypocotyl lengths were measured with the aid of ImageJ software (<http://rsbweb.nih.gov/ij/>). No less than 30 seedlings were measured for each genotype. For phenotype analysis of soil-grown plants in the *gal-3* background, seeds were imbibed in 100 μM GA<sub>3</sub> for 3 d at 4 °C and then washed thoroughly with water before planting in soil.

**Plasmid Construction.** Sequences of primers used in this study are listed in Table S1. The PCR-amplified fragments in all constructs were analyzed by DNA sequence analysis to ensure that no mutations were introduced.

**Constructs for expression of SCARECROW-LIKE 3 in transgenic Arabidopsis.** For making SCARECROW-LIKE 3 *SCL3*-OE [Cauliflower Mosaic Virus (CaMV) 35S promoter: *SCL3* cDNA] and 35S:*SCL3*-GFP, a full-length coding region of *SCL3* cDNA was amplified by PCR using primers SCL3 GF1 and SCL3 GR. The amplified DNA was then inserted into pENTR/D-TOPO (Invitrogen) followed by site-directed recombination to enter the binary vectors pGWB2 and pGWB5 for *SCL3*-OE and 35S:*SCL3*-GFP, respectively (2). For making *P<sub>SCL3</sub>*:*SCL3*, a 5.3-kb genomic DNA fragment carrying the *SCL3* gene, including a promoter region (2,783 bp) and a 3' downstream region (383 bp), was amplified by PCR with primers SCL3 GWP F1 and SCL3 3' Rev using a plasmid clone containing a 6.2-kb EcoRI *SCL3* genomic DNA fragment derived from a BAC clone (F11F12; GenBank accession no. AC012561.2) as a template. The amplified DNA fragment was then inserted into pENTR/D-TOPO (Invitrogen) followed by site-directed recombination to enter the binary vector pGWB1 (2). *P<sub>SCL3</sub>*:*SCL3*-GFP is a plasmid that contains 4-kb *SCL3* genomic DNA (including ~2.5 kb upstream sequence from the ATG start site of *SCL3* and the full-length *SCL3* coding sequence) fused to GFP (3).

**Constructs for coimmunoprecipitation.** To make 35S:*HA-RGA* (pEG201-RGA), the *RGA* cDNA sequence was amplified by PCR using primers 224 and 536 and then inserted into pENTR 1A (Invitrogen) by BamHI/NotI digestion followed by site-directed recombination to enter binary vector pEarleyGate201 (4). To make 35S:*cMyc-SCL3* (pEG203-SCL3), the *SCL3* coding sequence was PCR-amplified with primers SCL3-GW-N(C)5 and SCL3-GW-N3 and then introduced into the pCR8/GW/TOPO gateway vector (Invitrogen) by topo cloning followed by site-directed recombination to enter pEarleyGate203 (4). To make 35S:*cMyc-GUS-NLS* (pEG203-GUS-NLS, a negative control), the coding sequence of GUS (β-glucuronidase) was PCR-amplified from pBI101 vector using primers GUS-11 and GUS-12 to create GUS-SV40 NLS (5). This GUS-NLS fragment was cloned into pCR8/GW/TOPO vector and then into pEG203 by recombination.

**Constructs for bombardment transient expression.** Reporter constructs are derived from plasmids pRAB-5 and p35S:Renilla-luciferase (35S:*rluc*) that have been described before (6, 7). The firefly luciferase (*fluc*) gene from pRAB-5 was excised using the re-

striction enzymes NcoI and XbaI and cloned into the same sites in pFGC5941 (<http://www.chromdb.org/rnai/pFGC5941.html>) to generate a 35S-TMV-Ω-LUC construct that includes the Ω leader sequence of the Tobacco Mosaic Virus (TMV). This construct was designated pRZ500. A DNA fragment of the *SCL3* promoter was amplified from Col-0 genomic DNA by PCR with primers SCL3-prom-RI-Swa-F and SCL3-prom-Xho-R, restriction digested with EcoRI and XhoI, and cloned into the same sites of pRZ500. The resulting plasmid was cut with SwaI and NcoI to recover the 1-kb *SCL3* promoter fragment that includes the TMV-Ω leader sequence and was cloned into the polylinker of pRAB-5 to generate plasmid pRZ506 (SCL3-1kb-LUC). DNA fragments of the promoters of *GA3ox1* and *GA20ox2* were PCR-amplified with primer pairs 3ox1-prom-Swa-F and 3ox1-prom-Xho-R and 20ox2-prom-RI-Swa-F and 20ox2-prom-Xho-R, respectively. The PCR products were digested with SwaI and XhoI and cloned into the same sites in pRZ506, replacing the *SCL3* promoter. The new plasmids were designated pRZ507 (GA20ox2-LUC) and pRZ511 (GA3ox1-LUC). A 2-kb *SCL3* promoter construct was obtained by amplifying a DNA fragment from genomic DNA with primers SCL3-1900prom-H3-F and SCL3-prom-Xho-R. The resulting PCR product was cut with HindIII and XhoI and cloned into the same sites of pRZ506, replacing the 1-kb promoter with the 2-kb PCR product and generating plasmid pRZ535 (SCL3-2kb-LUC). Replacement of the *SCL3* TATA box with the 35S promoter TATA box was done in two steps. A PCR product was generated using pRZ500 as a template and primers 35S-minimal-BHI-RV and LUC-750-R; the resulting PCR product was cut with EcoRV and SphI and cloned into the same sites in pRAB-5, generating plasmid pRZ516 (35S-minimal-LUC). Subsequently, a *SCL3* promoter fragment lacking the putative TATA box was obtained by PCR using pRZ535 as a template and primers SCL3-1900prom-H3-F and SCL3p-100-BHI-R. The PCR product was cut with HindIII and BamHI and cloned into the same sites of pRZ516, generating the construct pRZ536 (SCL3-2kb+TATA-LUC).

Effector constructs are derived from pRTL2 (35S-Empty) and pRTL2-mGFP that were provided by Jim Carrington (8, 9). The mGFP sequence in pRTL2-mGFP was substituted with the coding sequence of *RGA* as an NcoI and BglII fragment to generate pRG37 (35S:RGA). To create pRZ530 (35S:SCL3), the coding sequence of *SCL3* was PCR-amplified from a cDNA clone using primers SCL3-NcoI-F and SCL3-XbaI-R cloned into pCR2.1 (Invitrogen); it was subsequently cut with XbaI and partially digested with NcoI to recover the full-length coding sequence. The fragment was then ligated into the same sites in pRTL2 (9).

**Constructs for yeast two-hybrid.** For making SCL3-DB (pSCL3-1), the coding sequence of *SCL3* was amplified from Col-0 genomic DNA by PCR using primers SCL3-1 and SCL3-2, cut with EcoRI and BamHI, and inserted into the DNA-BD vector pLexA-NLS. Sequencing results indicated that there were two silent mutations (<sup>138</sup>A→<sup>138</sup>G and <sup>1263</sup>C→<sup>1263</sup>T) in the coding sequence of *SCL3* gene. To make SCL31-AD, the coding sequence of *SCL31* (At1g07520) was PCR-amplified from a BAC clone (F22G5) using primers SCL31-3 and SCL31-2. The PCR fragment was first cloned into pCR8/GW/TOPO cloning vector (Invitrogen), and the *SCL31* coding sequence was then subcloned into NcoI and EcoRI sites of the prey vector pACT II. RGA-AD, GAI-AD, RGL1-AD, RGL2-AD, and RGL3-AD plasmids were made previously (1, 10).

**Constructs for expressing recombinant SCL3 proteins.** The coding sequence of *SCL3* in pSCL3-1 was excised by EcoRI/BamHI

digestion and subcloned into the same sites of pMAL-c2 (NEB). The construct was designated pMBP-SCL3.

To make the GST-SCL3 fusion construct, the *SCL3* coding sequence was amplified using PCR primers SCL3 CDS-5 (BamHI) and SCL3 CDS-3 (SalI); after digestion with BamHI/SalI, the PCR fragment was cloned into the same sites of pGEX-KG. The final construct was designated pGEX-SCL3, in which the GST-SCL3 fusion gene was placed under the control of the inducible *tac* promoter.

**In Vitro Pull-Down Assays.** The assay was performed as described before (11) with the following modifications. Both recombinant GST and GST-SCL3 were expressed in *Escherichia coli* TB1 (NEB), and ~8 µg recombinant proteins together with the glutathione Sepharose 4B beads (GE Healthcare) were used for the pull-down assay. Five grams of 10-d-old *sly1-10* and *rga-24 sly1-10* (in the *Ler* background) were used as starting material. The final pull-down protein samples were separated by a 6% SDS/PAGE gel and immunoblotted with affinity-purified anti-RGA antibodies (DU176) as described (12). Signal was detected by SuperSignal West Dura chemiluminescent substrate (Thermo Scientific Pierce).

**Transient Expression in *Nicotiana benthamiana* by Agro-Infiltration and Coimmunoprecipitation of SCL3 and RGA.** The transient expression constructs in pEarleyGate were transformed into agrobacterium GV3101. After overnight growth, agrobacterium cells were incubated in induction media (60 mM K<sub>2</sub>HPO<sub>4</sub>, 33 mM KH<sub>2</sub>PO<sub>4</sub>, 7.6 mM (NH<sub>4</sub>)<sub>2</sub>SO<sub>4</sub>, 2 mM sodium citrate, 1 mM MgSO<sub>4</sub>, 0.2% glucose, 0.4% glycerol, 10 mM MES, 50 µg/mL acetosyringone, pH 5.6) with antibiotics (50 µg/mL Kanamycin and 50 µg/mL Gentamicin) for 4 h. Cells were then resuspended in infiltration media (0.5× MS, 10 mM Mes, 150 µg/mL acetosyringone, pH 5.6) without antibiotics. Agrobacterium strains carrying different expression constructs were mixed to make final OD<sub>600</sub> ~ 0.8 for each strain and infiltrated into 5-wk-old *N. benthamiana* leaves by needle-less syringe; 72-h transiently transformed *N. benthamiana* leaves were cross-linked in 1% formaldehyde for 15 min by vacuum infiltration. Coimmunoprecipitation (co-IP) was performed using nuclear proteins extracted from cross-linked *N. benthamiana* leaves. Nuclear protein extracts were first diluted 10-fold in 1× PBS and 0.5% Triton X-100 with plant protease inhibitor mixture (P9599; Sigma) and then, incubated with 10 µL anti-cMyc agarose-conjugated beads (A7470; Sigma) for 90 min at 4 °C. After four washes with 1× PBS with protease inhibitors, proteins were eluted by boiling for 5 min in 2× Laemmli buffer and analyzed by SDS/PAGE and immunoblotting using monoclonal anti-cMyc antibody (MMS-150P; Covance) or monoclonal anti-HA antibody (MMS-101P; Covance) as primary antibodies. HRP-conjugated donkey anti-mouse antibody (Jackson ImmunoResearch) was used as secondary antibody. The blots were incubated in Supersignal Dura Reagent for chemiluminescence detection.

**Transient Expression Assays by Particle Bombardment of Arabidopsis Seedlings.** Surface-sterilized seeds were placed on 60- × 15-mm Petri dishes containing MS medium and incubated under constant light at 22 °C for 11–14 d. Particle bombardment was carried out using the PDS-1000/He particle gun delivery system (Bio-Rad Laboratories) as described previously (7), except that, instead of detached leaves, whole seedlings were used. Mixtures of plasmids were prepared using DNA molar ratios of 5:3 (reporters:effectors). When an effector construct was omitted, a similar molar amount of pRTL2 (35S-Empty Control) was included in the DNA mixture. Plasmid 35S:*rLUC* was included as a control of transformation. Each DNA mixture was bombarded to two different plates, and two samples were collected from each plate. After bombardment, the Petri dishes were sealed again and returned to the growth chamber for 20 h. A dual-luciferase reporter assay

(DLRA) system (Promega) was used to test for promoter activity. Firefly and Renilla LUC activities were measured with a fusion α-FP HT universal plate reader (Perkin-Elmer). Relative promoter activity was calculated as the ratio of fLUC to rLUC activities for each sample. The average of three or four replicates was used for each treatment.

**ChIP-qPCR.** The ChIP was performed as described previously (13, 14) with some modifications. Briefly, 7.5 g 10-d-old seedlings of *scl3-1* (control) and *scl3-1 P<sub>SCL3</sub>:SCL3-GFP* were fixed for 15 min in 1% formaldehyde by vacuum infiltration. Nuclei were isolated and followed by sonication using a Digital Sonifier S-250D (Branson Ultrasonics) to obtain DNA fragments around 0.5–1 kb. After preclarification with BSA equilibrated Protein A agarose beads (Upstate), sonicated chromatin was incubated at 4 °C over night with anti-GFP ab290 (Abcam). The GFP antibody, together with associated protein–DNA complex, was then pulled down by incubating with Protein A agarose beads for 6 h at 4 °C with rotation. The beads were then washed as described by Bowler et al. (13). Elution and cross-linking reversal was done by boiling the beads for 10 min in 500 µL freshly made elution buffer (100 mM NaHCO<sub>3</sub>, 0.1% SDS) followed by 1 h incubation at 45 °C with 200 mM NaCl, 10 mM EDTA, 40 mM Tris-HCl pH 6.5, and 0.1 mg/mL proteinase K. The chromatin was precipitated by ethanol after phenol/chloroform extraction. The purified DNA was resuspended in 200 µL TE (10 mM Tris-HCl pH 8.0, 1 mM EDTA) buffer.

For promoter scanning of the *SCL3*, *GA20ox1*, *GA20ox2*, and *GA20ox3* genes, different regions of each promoter were examined by ChIP-qPCR assay. Primers used for the assay are listed in Table S1. All qPCR reactions were carried out using the LightCycler SYBR Green I Fast Start DNA kit (Roche). Reactions were performed with 1 µL immunoprecipitated DNA as template, and samples from *scl3-1* control line and *scl3-1 P<sub>SCL3</sub>:SCL3-GFP* transgenic line were compared. The amount of 18S rRNA gene from the ChIP samples was quantified by qPCR (1) to normalize the results between the control and test samples. The copy numbers of the *SCL3-GFP* transgene and its corresponding promoter regions were determined by real-time qPCR using genomic DNAs of the transgenic line *scl3 P<sub>SCL3</sub>:SCL3-GFP* and the *scl3* mutant as template. Student *t* tests were performed using the statistical package SPSS version 17.0.

**Generation of Anti-SCL3 Antibodies and Immunoblot Analysis.** The purified maltose binding protein (MBP)-SCL3 fusion protein from pMBP-SCL3 was used to raise polyclonal anti-SCL3 antibodies in rat (Cocalico Biologicals). The anti-SCL3 crude antiserum (DU-R24) was affinity-purified by GST-SCL3 fusion proteins using Affi-gel Blue gel followed by Affi-gel 15 (Bio-Rad). The endogenous SCL3 protein from different GA mutants was detected by using affinity-purified DU-R24. The immunoblot analysis procedure was similar to the protocol described before (12), except that 1× TBS buffer (50 mM Tris-HCl, pH 7.5, 150 mM NaCl, 0.05% Tween 20) was used (instead of PBS) in the entire procedure, and 5% milk was omitted when blotting with primary (DU-R24) and secondary antibodies (donkey anti-rat; Jackson ImmunoResearch Laboratory). The DU-R24 will not be available for distribution after publication, because the titer of DU-R24 is extremely low.

**Yeast Two-Hybrid Assays.** The LexA-based yeast two-hybrid (Y2H) assay using the yeast strain L40 was performed as described (10). For 3-AT assay, various concentrations of 3-AT (0, 1, 2, 5, 10, 30, and 60 mM) were mixed in synthetic complete medium lacking Trp, Leu, and His. For each combination, 2 µL yeast cells with OD<sub>600</sub> values of 0.25, 0.125, and 0.05, respectively, were spotted on media plates.

1. Tyler L, et al. (2004) DELLA proteins and gibberellin-regulated seed germination and floral development in *Arabidopsis*. *Plant Physiol* 135:1008–1019.
2. Nakagawa T, et al. (2007) Development of series of gateway binary vectors, pGWBs, for realizing efficient construction of fusion genes for plant transformation. *J Biosci Bioeng* 104:34–41.
3. Heo J-O, et al. (2010) Funneling of gibberellin signaling by the GRAS transcription factor SCARECROW-LIKE 3 in the *Arabidopsis* root. *Proc Natl Acad Sci USA*, 10.1073/pnas.1012215108.
4. Earley KW, et al. (2006) Gateway-compatible vectors for plant functional genomics and proteomics. *Plant J* 45:616–629.
5. Kalderon D, Roberts BL, Richardson WD, Smith AE (1984) A short amino acid sequence able to specify nuclear location. *Cell* 39:499–509.
6. Matsuo N, Minami M, Maeda T, Hiratsuka K (2001) Dual luciferase assay for monitoring transient gene expression in higher plants. *Plant Biotechnol* 18:71–75.
7. Yamakawa S, et al. (2004) Systematic transient assays of promoter activities for leaf-specific genes identified by gene-expression profiling with cDNA microarrays in *Arabidopsis thaliana*. *J Biosci Bioeng* 98:140–143.
8. Schaad MC, Jensen PE, Carrington JC (1997) Formation of plant RNA virus replication complexes on membranes: Role of an endoplasmic reticulum-targeted viral protein. *EMBO J* 16:4049–4059.
9. Carrington JC, Freed DD, Oh CS (1990) Expression of potyviral polyproteins in transgenic plants reveals three proteolytic activities required for complete processing. *EMBO J* 9:1347–1353.
10. Dill A, Thomas SG, Hu J, Steber CM, Sun T-p (2004) The *Arabidopsis* F-box protein SLEEPY1 targets GA signaling repressors for GA-induced degradation. *Plant Cell* 16:1392–1405.
11. Griffiths J, et al. (2006) Genetic characterization and functional analysis of the GID1 gibberellin receptors in *Arabidopsis*. *Plant Cell* 18:3399–3414.
12. Silverstone AL, et al. (2001) Repressing a repressor: Gibberellin-induced rapid reduction of the RGA protein in *Arabidopsis*. *Plant Cell* 13:1555–1566.
13. Bowler C, et al. (2004) Chromatin techniques for plant cells. *Plant J* 39:776–789.
14. Cui HC, et al. (2007) An evolutionarily conserved mechanism delimiting SHR movement defines a single layer of endodermis in plants. *Science* 316:421–425.
15. Zentella R, et al. (2007) Global analysis of DELLA direct targets in early gibberellin signaling in *Arabidopsis*. *Plant Cell* 19:3037–3057.
16. Pouillet P, Tamanoi F (1995) Use of yeast two-hybrid system to evaluate Ras interactions with neurofibromin-GTPase-activating protein. *Methods Enzymol* 255:488–497.
17. Bolle C (2004) The role of GRAS proteins in plant signal transduction and development. *Planta* 218:683–692.
18. Dill A, Sun T (2001) Synergistic derepression of gibberellin signaling by removing RGA and GAI function in *Arabidopsis thaliana*. *Genetics* 159:777–785.

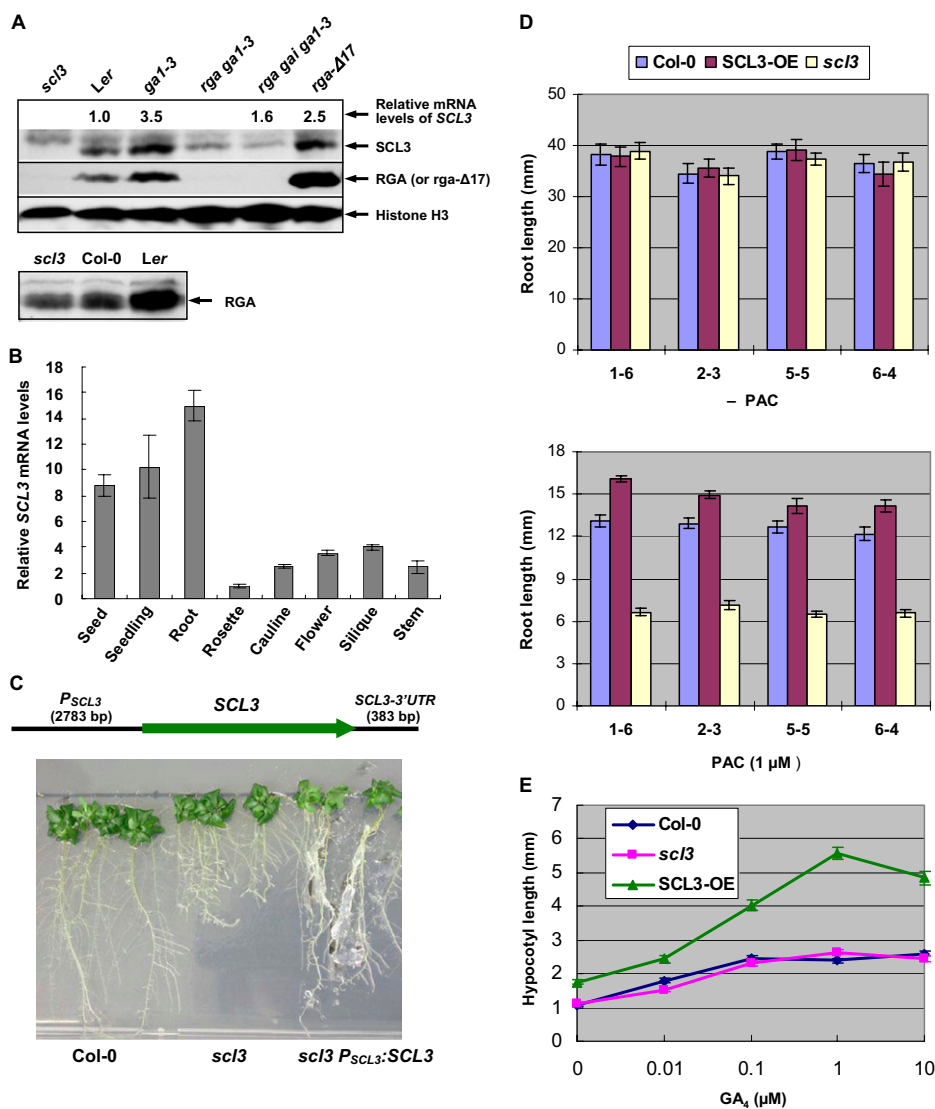

**Fig. S1.** Expression profile of *SCL3* and phenotypes of *scI3* and *SCL3-OE* lines. (A) DELLA induces both *SCL3* mRNA and protein accumulation. (Upper) Both *SCL3* mRNA and protein levels are increased in *ga1-3* and *rga-Δ17* and reduced by *rga-24* and *gai-t6* null mutations. Relative *SCL3* transcript levels in 8-d-old seedlings (15) are listed above the blot. For immunoblot assays, proteins were extracted from roots of 8-d-old WT (*Ler*) and different GA mutants. All mutants except *scI3* are in the *Ler* background. Immunoblot analyses were carried out using affinity-purified antibodies against *SCL3* and RGA, respectively. The histone proteins detected with anti-histone H3 antibody (ab1791; Abcam) served as a loading control. (Lower) RGA proteins accumulate to higher levels in the *Ler* background than in the Col-0 background (WT and *scI3* mutant). This explains why RGA was not detected in *scI3* (in the Col-0 background) in Upper. Proteins were extracted from roots of 8-d-old *scI3*, Col-0, and *Ler*, respectively. Immunoblot analysis was carried out using affinity-purified anti-RGA antibodies. A longer exposure time (than in Upper) was needed to detect the RGA protein in *scI3* and Col-0. (B) *SCL3* in WT (Col-0) is expressed highest in germinating seeds and seedlings. Data represent the average of three qRT-PCR measurements  $\pm$  SE. The housekeeping gene *Actin 11* (At3g12110), whose expression remains similar in different tissues, was used to normalize different samples. The tissue with the lowest *SCL3* expression (rosette leaves) was arbitrarily set to 1. Seed, germinating seeds; seedling, 10-d-old seedlings; root, from 10-d-old seedlings; rosette, rosette leaves of 5-wk-old plants; cauline, cauline leaves; flower, flower clusters; silique, siliques; stem, stem tissue only, with all leaves and inflorescences removed. (C)  $P_{SCL3}:SCL3$  rescued *scI3* root phenotype (14-d-old seedlings). (Upper) The  $P_{SCL3}:SCL3$  genomic DNA construct. (Lower) The *scI3* root phenotype was rescued by  $P_{SCL3}:SCL3$  in the presence of 0.5  $\mu$ M uniconazole, a GA biosynthesis inhibitor with similar effect as PAC. (D) Overexpression of *SCL3* caused longer root phenotype. Col-0, *scI3*, and four independent *SCL3-OE* lines were subjected to root-length assay in the absence (Upper) or presence (Lower) of 1  $\mu$ M PAC as in Fig. 1B. Root lengths were measured on day 7. (E) Overexpression of *SCL3* caused longer hypocotyl phenotype. Hypocotyl elongation assays in response to 1–10  $\mu$ M GA<sub>4</sub> were performed using WT, *scI3*, and *SCL3-OE* line (#5) as in Fig. 1D. The x axis is on a log scale.



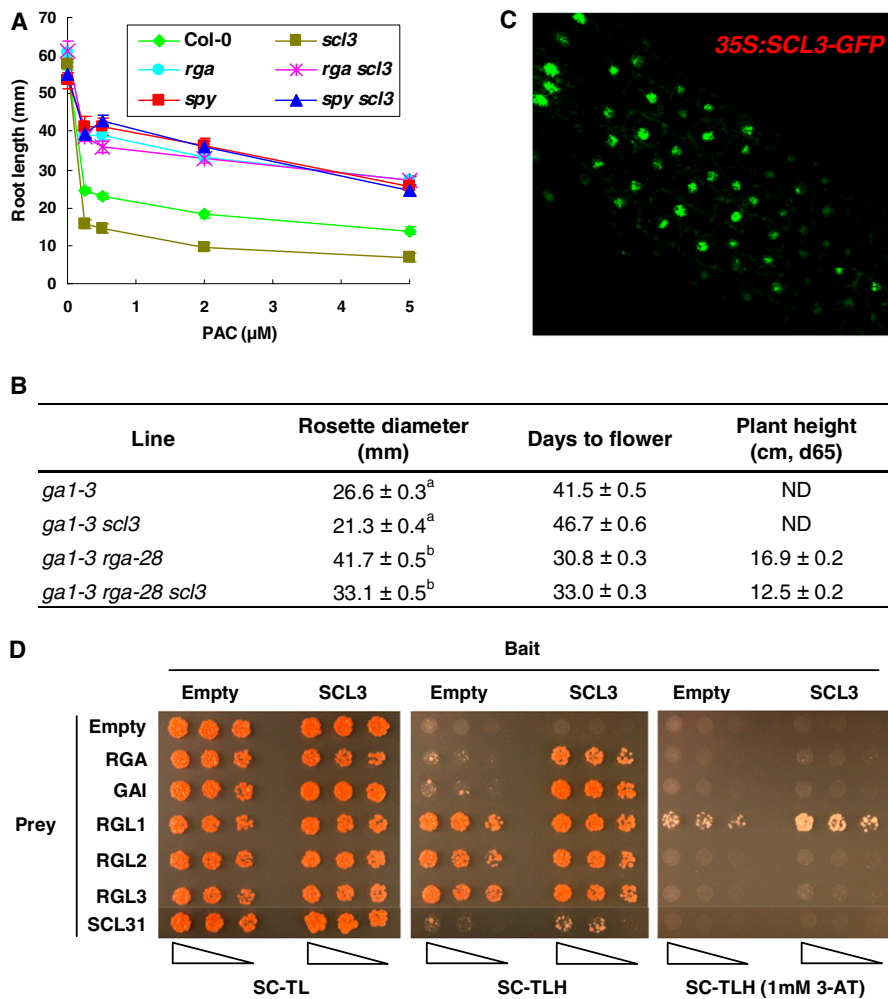

**Fig. S2.** Genetic and protein–protein interactions between SCL3 and RGA/SPY. (A) *rga* and *spy* are epistatic to *scl3* in root elongation assays. Root lengths were measured on day 10. (B) *rga* is partially epistatic to *scl3* in regulating rosette leaf expansion, flowering time, and stem elongation. a, the rosette diameters of *ga1-3* and *ga1-3 scl3* plants were measured on day 58; b, the rosette diameters of *ga1-3 rga-28* and *ga1-3 rga-28 scl3* plants were measured on day 37. (C) SCL3-GFP fusion proteins are nuclear-localized. A root segment of transgenic plant containing *35S:SCL3-GFP* (in the *rga-24 ga1-3* background) was imaged by confocal microscopy. (D) Weak interactions between SCL3 and DELLAs in yeast two-hybrid assays. SC-TL, synthetic complete medium lacking Trp and Leu; SC-TLH, synthetic complete medium lacking Trp, Leu, and His; 3-AT, a competitive inhibitor of His3 enzyme. For each strain, 2  $\mu$ L yeast cells with OD<sub>600</sub> values of 0.25, 0.125, and 0.05, respectively, were spotted on media plates. The triangle symbols indicate serial dilutions of yeast cells. Red colonies indicate more robust growth, because the host strain is *ade2*<sup>-</sup>; a red color intermediate of the adenosine biosynthesis pathway accumulates when the colony grows to saturation (16). SCL3 showed a weak interaction with RGA and GAI in the SC-TLH media (0 mM 3-AT). As shown in the SC-TLH panel, RGL1, RGL2, and RGL3 alone (in the prey vector) self-activated the His3 reporter gene. RGL1 showed a weak interaction with SCL3 in the presence of 1 mM 3-AT. No interaction could be detected between SCL3 and the other two DELLAs (RGL2 and RGL3). SCL31, a GRAS protein that is divergent from both the DELLA subfamily and SCL3 (17), did not show any interaction with SCL3, suggesting that SCL3–DELLA interactions are specific.

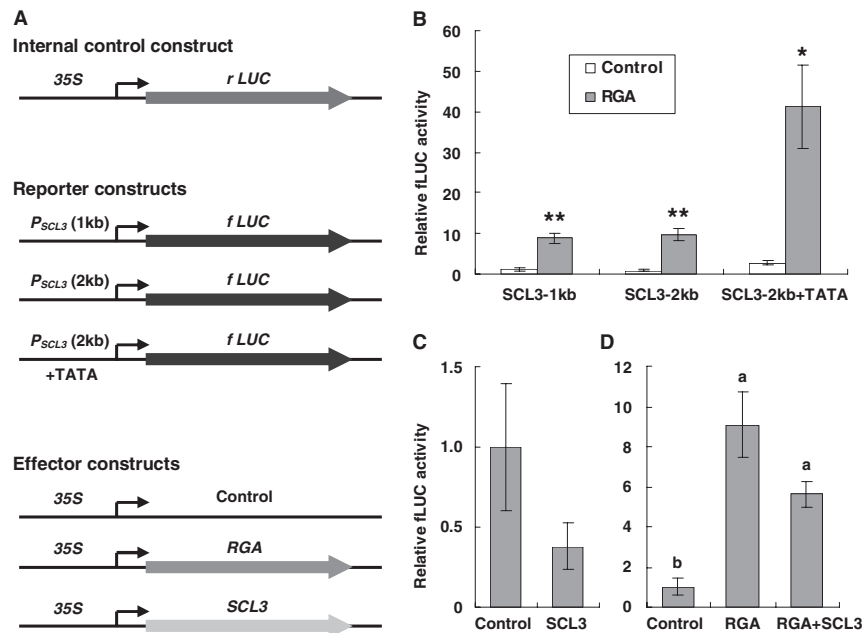

**Fig. S3.** SCL3 interferes with RGA to regulate *SCL3* promoter in transient expression studies. (A) Schematics of the internal control, reporter, and effector constructs. The firefly luciferase gene (*fLUC*) was placed under the control of different versions of *SCL3* promoter (*P<sub>SCL3</sub>:fLUC*: 1, 2, and 2 kb + TATA) serving as reporter constructs. The 1- and 2-kb *SCL3* promoter constructs also contain 68 bases of the 5' UTR. The third reporter construct (same as in Fig. 3) has the 2-kb promoter, but its -100 to ~+1 region was replaced by the CaMV minimal promoter (-45- to ~+1-bp region that includes the TATA box). *35S:Renilla LUC* (*rLUC*) served as an internal control for normalization of transformation efficiency; *35S:RGA* and *35S:SCL3* served as two effector constructs, respectively. The empty vector was used as a control in the transient coexpression assay. (B) The 2-kb *SCL3* promoter with the CaMV TATA sequence showed enhanced expression and remained responsive to RGA. *P<sub>SCL3</sub>:fLUC* and *35S:rLUC* constructs were cobombarded into 14-d-old *ga1-3 rga-24 gai-t6* seedlings (in the *Ler* background) (18) with the empty effector constructs (Control) or *35S:RGA* using the same molar ratios. The relative fLUC activity of *SCL3*-1kb was set to 1. Data represent the average value  $\pm$  SE of three replicates. (C and D) The construct *P<sub>SCL3</sub>:fLUC* (with 1-kb *SCL3* promoter) and the internal control *35S:rLUC* were cobombarded into 12-d-old *ga1 rga gai* seedlings with various effector construct, respectively, using the same molar ratio. The average fLUC activity of the control was set to 1. Data represent the average value  $\pm$  SE of four replicates. Pair-wise *t* tests were performed. (B) \*\**P* < 0.01; \**P* < 0.05. (D) When two samples show different letters (a–b) above the bars, the difference between them is significant (*P* < 0.05).

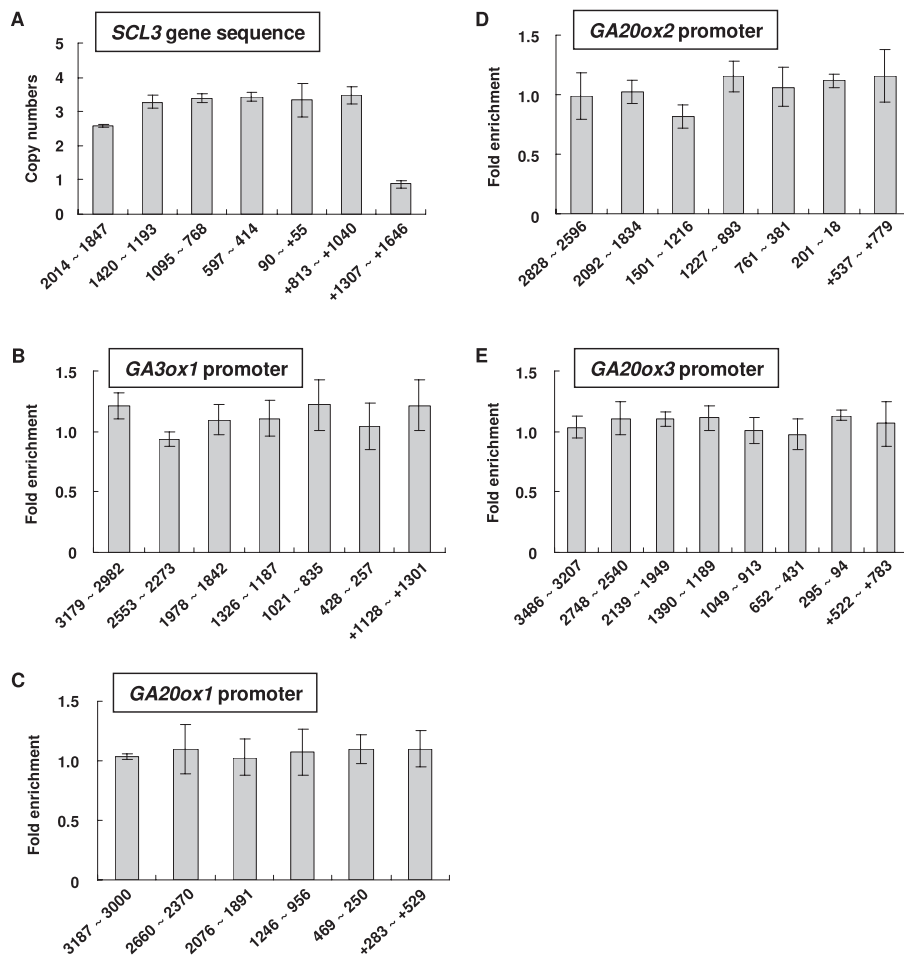

**Fig. 54.** Copy number of *SCL3* sequence in the *scI3*  $P_{SCL3}$ :*SCL3-GFP* line and promoter scanning of GA biosynthetic genes. (A) qPCR analysis of the copy numbers of each indicated region in the *scI3*  $P_{SCL3}$ :*SCL3-GFP* line (Fig. 4). The genomic DNAs of the transgenic line *scI3*  $P_{SCL3}$ :*SCL3-GFP* and the *scI3* mutant were used as templates. A series of primers were used to amplify different regions of the transgene  $P_{SCL3}$ :*SCL3-GFP* and the endogenous *SCL3* gene (Fig. 4). The only exception was that a primer pair flanking the stop codon of the native *SCL3* gene can amplify the endogenous *SCL3* gene sequence but not the  $P_{SCL3}$ :*SCL3-GFP* transgene (+1,307 to ~+1,646). The fold change of the *SCL3-GFP* line was normalized to the control *scI3*. (B–E) Promoter scanning of *GA3ox1* (B), *GA20ox1* (C), *GA20ox2* (D), and *GA20ox3* (E) by ChIP-qPCR. Chromatin preparations of the control *scI3* or the *SCL3-GFP* transgenic line were subjected to ChIP followed by qPCR. Fold enrichment of each region in the *SCL3-GFP* line was calculated by comparing with the control *scI3*. The values of fold enrichment are the average  $\pm$  SE of three qPCR reactions from two independent ChIP experiments. (A–E) The numbers underneath each bar indicate base pairs upstream of the ATG of each gene. A plus sign indicates base pairs downstream of the ATG.

**Table S1. List of primers and their uses**

| Primer                  | Sequence                                           | Use                                               | Notes                                    |
|-------------------------|----------------------------------------------------|---------------------------------------------------|------------------------------------------|
| <b>T-DNA analysis</b>   |                                                    |                                                   |                                          |
| SALK_002516 LP          | TTCCTCTGTTCTTTAACCCCC                              | Genotyping <i>SCL3</i>                            | WT allele 998-bp PCR product             |
| SALK_002516 RP          | AGCGCAGTCTTTCTCATGAG                               |                                                   |                                          |
| SALK_LBa1               | TGGTTCACGTAGTGGCCATCG                              | Genotyping <i>scl3-1</i>                          | Mutant allele 844-bp PCR product         |
| SALK_LBb1.3             | ATTTTGCCGATTTCCGGAAC                               | Genotyping <i>scl3-1</i> ; sequencing             | Mutant allele 701-bp PCR product         |
| <b>Cloning</b>          |                                                    |                                                   |                                          |
| SCL3-1                  | GTAGGAATTCATGGTGGCTATGTTTCAAGAAG                   | Cloning of SCL3 coding sequence                   | Construction of pSCL3-1                  |
| SCL3-2                  | ACTAGGATCTCACTTCTCGCATCTCCAAGCT                    |                                                   |                                          |
| SCL3 CDS-5 (BamHI)      | CGAGGATCCATGGTGGCTATGTTTCAAGAAG                    | Cloning of SCL3 coding sequence                   | Construction of pGEX-SCL3                |
| SCL3 CDS-3 (Sall)       | ATAGTCGACTCACTTCTGCATCTCCAAG                       |                                                   |                                          |
| SCL31-3                 | CGTCCATGGAATCGAATTACTCAGGTG                        | Cloning of SCL31 coding sequence                  | Construction of pACT2-SCL31 (SCL31-AD)   |
| SCL31-2                 | CGAGAATTCCTAAGAAGGGACCCAACAAGAAG                   |                                                   |                                          |
| RGA-224                 | ACGCGGATCCGAATGAAGAGAGATCATCACC                    | Cloning of RGA                                    | Construction of pEG201-RGA               |
| RGA-536                 | GACAGCGGCCGCTCAGTACGCCCGCTCGAGA                    |                                                   |                                          |
| SCL3-GW-N(C)5           | ATGGTGGCTATGTTTCAAGAAGATAATGG                      | Cloning of SCL3 coding sequence                   | Construction of pEG203-SCL3              |
| SCL3-GW-N3              | TCACTTCTGCATCTCCAAGCTGATAC                         |                                                   |                                          |
| GUS-11                  | ATGTTACGTCCTGTAGAAACCC                             | Cloning of GUS (+ NLS)                            | Construction of pEG203-GUS-NLS           |
| GUS-12                  | TTATACTTTTCTTCTTTTTGGATCTTGTGTTG<br>CCTCCCTGCTGCGG |                                                   |                                          |
| SCL3-prom-RI-Swa-F      | AGAATTCATTTAAATCCACACCCAAGCCTCAG                   | Cloning of 1-kb SCL3 promoter                     | Construction of pRZ506                   |
| SCL3-prom-Xho-R         | AGCCTCGAGGGTTCTCTCAATCTTTATC                       |                                                   |                                          |
| 3ox1-prom-Swa-F         | CATTTAAATAACTGGTATTCAAAGATAG                       | Cloning of 1-kb GA3ox promoter                    | Construction of pRZ511                   |
| 3ox1-prom-Xho-R         | CCTCGAGAAGTGTGGTGTGTTGGTG                          |                                                   |                                          |
| 20ox2-prom-RI-Swa-F     | AGAATTCATTTAAATTCAAACTATGTAAGACG                   | Cloning of 1-kb GA20ox2 promoter                  | Construction of pRZ507                   |
| 20ox2-prom-Xho-R        | AGCCTCGAGTGAGTGTGTTGAGGAG                          |                                                   |                                          |
| SCL3-1900prom-H3-F      | CTTCTTAAAGCTTCAAATAAGTTGATTCATCCATC                | Cloning of 2-kb SCL3 promoter                     | Construction of pRZ535                   |
| SCL3-prom-Xho-R         | AGCCTCGAGGGTTCTCTCAATCTTTATC                       |                                                   |                                          |
| 35S-minimal-BHI-RV      | CGGATCCGATATCGCAAGACCTTCTCTATA                     | Cloning of 35S-TATA box and 5' end of LUC         | Construction of pRZ516                   |
| LUC-750-R               | GTGTAGTAAACATTCAAAAC                               |                                                   |                                          |
| SCL3-1900prom-H3-F      | CTTCTTAAAGCTTCAAATAAGTTGATTCATCCATC                | Cloning of 2-kb SCL3 promoter (without TATA)      | Construction of pRZ536                   |
| SCL3p-100-BHI-R         | GGGAGGATCCTTTAAGAAAGAAAACACTA                      |                                                   |                                          |
| SCL3-NcoI-F             | ATCCCATGGTGGCTATGTTTCAAG                           | Cloning of SCL3 coding sequence                   | Construction of pRZ530                   |
| SCL3-XbaI-R             | GAGTCTAGAGTCACTTCTGCATCTCCAAG                      |                                                   |                                          |
| SCL3 GF1                | CACCATGGTGGCTATGTTTCAAGAAG                         | Cloning of SCL3 cDNA                              | Construction of SCL3-OE and 35S:SCL3-GFP |
| SCL3 GR                 | TCACTTCTGCATCTCCAAG                                | Cloning of SCL3 cDNA                              | Construction of SCL3-OE and 35S:SCL3-GFP |
| SCL3 GWP F1             | CACCAAAGGCAAGAGTTTCAAGGAGG                         | Cloning of SCL3 genomic DNA                       | Construction of P <sub>SCL3</sub> :SCL3  |
| SCL3 3' Rev             | GAGATCTTCTTCTTTGGGATC                              | Cloning of SCL3 genomic DNA                       | Construction of P <sub>SCL3</sub> :SCL3  |
| <b>Quantitative PCR</b> |                                                    |                                                   |                                          |
| Act11 fLC               | TACCTCAGCAGAGAGCGT                                 | Act 11 qRT-PCR                                    | 184-bp PCR product                       |
| Act11 rLC               | GAACAGAACCTGGCCC                                   |                                                   |                                          |
| GAPC F2                 | AGTGCTACCTACGATG                                   | GAPC qRT-PCR                                      | 219-bp PCR product                       |
| GAPC R2                 | CACACGGGAAGTGTAAAC                                 |                                                   |                                          |
| At4g33380-5DQ           | TAGAAACGTGGCGCAA                                   | EXP-PT qRT-PCR                                    | 239-bp PCR product                       |
| At4g33380-3DQ           | TGGTCTGCCTGCCAATA                                  |                                                   |                                          |
| At18SFrnt               | ATACGTGCAACAAACCC                                  | 18S ChIP-qPCR                                     | 301-bp PCR product                       |
| At18SRnt                | CTACCTCCCCGTGTC                                    |                                                   |                                          |
| SCL3 fLC                | AACAACAATGGGTATAGCC                                | qRT-PCR analysis of developmental profile of SCL3 | 195-bp PCR product                       |
| SCL3 rLC                | TGCTGCGTAGGTGTAA                                   |                                                   |                                          |
| KS F                    | AACGGAGATTGGACTCAGAA                               | KS qRT-PCR                                        | 237-bp PCR product                       |
| KS R                    | CATGGTTATCAAGTCCCAAG                               |                                                   |                                          |
| AtKO1 f                 | TGCTGCGGAGGAGAAAAGT                                | KO qRT-PCR                                        | 149-bp PCR product                       |
| AtKO1 r                 | GATAGCCTCCGATTTGCGTA                               |                                                   |                                          |
| KAO1fLC                 | CTGACTCCTTCACTCGC                                  | KAO1 qRT-PCR                                      | 224-bp PCR product                       |
| KAO1rLC                 | CCTGAGACGCTTGTGTT                                  |                                                   |                                          |
| KAO2fLC                 | TCCATTTGGACCTGAAATC                                | KAO2 qRT-PCR                                      | 234-bp PCR product                       |
| KAO2rLC                 | TGTGAGGCAAGAACATCACC                               |                                                   |                                          |



**Table S1. Cont.**

| Primer                 | Sequence              | Use                                                          | Notes              |
|------------------------|-----------------------|--------------------------------------------------------------|--------------------|
| GA20ox1-5DQ            | GGGCTAAGTTTAGGCGT     | GA20ox1 qRT-PCR                                              | 377-bp PCR product |
| GA20ox1-3DQ            | GGTGGCGTCACTACTC      |                                                              |                    |
| GA20ox2F               | TCCAACGATAATAGTGGCT   | GA20ox2 qRT-PCR                                              | 234-bp PCR product |
| GA20ox2R               | TTGGCATGGAGGATAATGA   |                                                              |                    |
| GA20ox3-5DQ            | TCCTAACCTCACGCT       | GA20ox3 qRT-PCR                                              | 266-bp PCR product |
| GA20ox3-3DQ            | TGCTGCCTATAATGCT      |                                                              |                    |
| GA4F                   | CCATTACCTCCACACTCT    | GA3ox1 qRT-PCR                                               | 401-bp PCR product |
| GA4R                   | GCCAGTGATGGTGAAACCTT  |                                                              |                    |
| 3ox2Frnt               | TGGTCCGAAGGTTTCAC     | GA3ox2 qRT-PCR                                               | 298-bp PCR product |
| 3ox2Rrt                | GGGTCGAGTCTGTATGG     |                                                              |                    |
| GA2ox1F5GT             | TGAGGACGAGAGGTTGTACGA | GA2ox1 qRT-PCR                                               | 101-bp PCR product |
| GA2ox1R5GT             | TCCTTTCAATTGTTGAAGCC  |                                                              |                    |
| GA2ox2-5DQ             | TGGAAGTTGGGTGCGCT     | GA2ox2 qRT-PCR                                               | 199-bp PCR product |
| GA2ox2-3DQ             | GACAAGGCATGGCAAT      |                                                              |                    |
| GA2ox4-5DQ             | GGTCGAGTATTTGCTGTT    | GA2ox4 qRT-PCR                                               | 221-bp PCR product |
| GA2ox4-3DQ             | CGGACGGTGGATAATG      |                                                              |                    |
| GA2ox6-5DQ             | GCGTTAAGTGGCGTTG      | GA2ox6 qRT-PCR                                               | 212-bp PCR product |
| GA2ox6-3DQ             | CTATGCCTCACGCTAGT     |                                                              |                    |
| SCL3CDS5UTR-5RQ (P2 F) | ACACACGCTATTACTCACAA  | Detection of endogenous SCL3 transcript                      | 349-bp PCR product |
| SCL3CDS5UTR-3RQ (P2 R) | CGAGGAGAGTTCGGTCTG    |                                                              |                    |
| SCL3CDS-5RQ-2 (P1 F)   | GAACTGCGCTTTACGG      | Detection of transgenic and endogenous SCL3 transcript       | 228-bp PCR product |
| SCL3CDS-3RQ-2 (P1 R)   | GTGACCACCATGACCT      |                                                              |                    |
| SCL3-scan1A-F          | TAAACGAGAGTTGCCTCC    | ChIP-qPCR SCL3 promoter scanning (region 2,014 to 1,847)     | 168-bp PCR product |
| SCL3-scan1A-R          | GCTTGGTACGAAGACCG     |                                                              |                    |
| SCL3-1300-F            | CACACCCAAGCCTCAG      | ChIP-qPCR SCL3 promoter scanning (region 1,420 to 1,139)     | 228-bp PCR product |
| SCL3-1300-R            | TGGCATGAGGTGGATT      |                                                              |                    |
| SCL3-900-F             | AATGCCAAATGGGTTCA     | ChIP-qPCR SCL3 promoter scanning (region 1,095 to 768)       | 328-bp PCR product |
| SCL3-900-R             | TGAGTGCTCTTAAAGTGGT   |                                                              |                    |
| SCL3-500-F             | AACCGACTATCACGCA      | ChIP-qPCR SCL3 promoter scanning (region 597 to 414)         | 184-bp PCR product |
| SCL3-500-R             | GGGAGTGAGAGGGTTC      |                                                              |                    |
| SCL3-scan3A-F          | TCGTTACGAGTCTCTCAAAG  | ChIP-qPCR SCL3 promoter scanning (region 90 to +55)          | 145-bp PCR product |
| SCL3-scan3A-R          | GTGGTGATGAAGCTACAG    |                                                              |                    |
| SCL3CDS-5RQ-2          | GAACTGCGCTTTACGG      | ChIP-qPCR SCL3 promoter scanning (region +813 to +1,040)     | 228-bp PCR product |
| SCL3CDS-3RQ-2          | GTTACCACCATGACCT      |                                                              |                    |
| SCL3-5RQ               | ATTATGCGATGTTGCAGG    | ChIP-qPCR SCL3 promoter scanning (region +1,307 to +1,646)   | 340-bp PCR product |
| SCL3-3RQ               | ATTACACCACACCAGAC     |                                                              |                    |
| 3ox1-scan8A-F          | TGTTGGACATTGTGCTG     | ChIP-qPCR GA3ox1 promoter scanning (region 3,179 to 2,982)   | 198-bp PCR product |
| 3ox1-scan8A-R          | GTGTGACTGTGTGCAT      |                                                              |                    |
| 3ox1-scan10A-F         | CCCTTTGTTAAGATGCCAG   | ChIP-qPCR GA3ox1 promoter scanning (region 2,553 to 2,273)   | 281-bp PCR product |
| 3ox1-scan10A-R         | TGATAATCACTCCGAATCTA  |                                                              |                    |
| 3ox1-scan11A-F         | ACATATCACGGTCATTACCA  | ChIP-qPCR GA3ox1 promoter scanning (region 1,978 to 1,842)   | 152-bp PCR product |
| 3ox1-scan11A-R         | TGCTGCAAAGTAGACG      |                                                              |                    |
| 3ox1-scan12A-F         | AGACTAGCGACCACAT      | ChIP-qPCR GA3ox1 promoter scanning (region 1,326 to 1,187)   | 159-bp PCR product |
| 3ox1-scan12A-R         | TTGGTTAGACGATTACGGAG  |                                                              |                    |
| GA3ox1-900-F           | CGTTCCCTTCCAAAGT      | ChIP-qPCR GA3ox1 promoter scanning (region 1,021 to 835)     | 187-bp PCR product |
| GA3ox1-900-R           | AAGGGCCAATGTTGTC      |                                                              |                    |
| 3ox1-scan14A-F         | ATGGATAGATACGGTTAACTT | ChIP-qPCR GA3ox1 promoter scanning (region 428 to 257)       | 172-bp PCR product |
| 3ox1-scan14A-R         | GTCCCGCCATTTCTT       |                                                              |                    |
| 3ox1-coding2-F         | ATACCGACTCCACCTT      | ChIP-qPCR GA3ox1 promoter scanning (region +1,128 to +1,301) | 174-bp PCR product |
| 3ox1-coding2-R         | GGTGCACACGCTTTTA      |                                                              |                    |
| GA20ox1-scan-F4        | ATCTTGATCGTACTTGTT    | ChIP-qPCR GA20ox1 promoter scanning (region 3,187 to 3,000)  | 188-bp PCR product |
| GA20ox1-scan-R4        | TGGACCACTAGAGGTTG     |                                                              |                    |
| GA20ox1-scan-F5        | GACATGCTTTTCAGCGT     | ChIP-qPCR GA20ox1 promoter scanning (region 2,660 to 2,370)  | 291-bp PCR product |
| GA20ox1-scan-R5        | ACCAACAATGCTGGA       |                                                              |                    |
| GA20ox1-scan-F7        | GAGCCGGAATCAACCT      | ChIP-qPCR GA20ox1 promoter scanning (region 2,076 to 1,891)  | 186-bp PCR product |
| GA20ox1-scan-R7        | AGACATGAGCATGGTCCG    |                                                              |                    |
| GA20ox1-scan-F9        | AAGCGGTAGCAAGACT      | ChIP-qPCR GA20ox1 promoter scanning (region 1,246 to 956)    | 291-bp PCR product |
| GA20ox1-scan-R9        | GGCTGGGTGATTGAGAA     |                                                              |                    |
| GA20ox1-300-F          | TGCCACACAACAACAT      | ChIP-qPCR GA20ox1 promoter scanning (region 469 to 250)      | 220-bp PCR product |
| GA20ox1-300-R          | TTGCTAAAAACAAGTGGT    |                                                              |                    |
| GA20ox1-scan-F13       | GTGGTCAATCACGGCA      | ChIP-qPCR GA20ox1 promoter scanning (region +283 to +529)    | 247-bp PCR product |
| GA20ox1-scan-R13       | CCAACGCATCGAGAA       |                                                              |                    |
